# Supplementary material
Source: PubMed Central journal article supplement (PMC5669802)
Supplement: NIHMS900684-supplement-1.pdf [file NIHMS900684-supplement-1.pdf]

## **Supplementary data**

**Supplementary Figure S1.** Resistant tumor growth is evident for osimertinib and JNJ-61186372 monotherapy in NSCLC cell line xenografts.

**Supplementary Figure S2.** Multiplex TMT-labeling scheme and results from MS analysis of NSCLC xenograft tumors.

**Supplementary Figure S3.** Evaluation of *in vivo* target efficacy in HCC827 and HCC827-ER1 xenografts after 6-hour treatment with osimertinib and JNJ-61186372 alone or in combination.

**Supplementary Figure S4.** Phosphopeptide correlation and heterogeneous phosphoprotein network upregulation in resistant tumors.

**Supplementary Figure S5.** Kinase substrate motif enrichment analyses of resistant tumors.

**Supplementary Figure S6.** Combined EGFR and SFK inhibition results in superior growth inhibition of DR-HCC827 cells.

**Supplementary Table S1: Summary of data from vehicle-treated tumors.**

**Supplementary Table S2: Summary of data from target efficacy evaluation.**

**Supplementary Table S3: Summary of data from drug resistant tumors.**

**A**

Cell lines: H1975, H1975-HGF, HCC827, HCC827-ER1

| Experiment         | Type        | N  | Treatment    | Dose (mg/kg) | Dosing route | Doses administered |
|--------------------|-------------|----|--------------|--------------|--------------|--------------------|
| Vehicle            | Control     | 5  | PBS          | 0            | p.o.         | Single dose        |
| Target efficacy    | Single drug | 5  | Osimertinib  | 5            | p.o.         | Single dose        |
| Target efficacy    | Single drug | 5  | JNJ-61186372 | 10           | i.p.         | Single dose        |
| Target efficacy    | Combo       | 5  | Osimertinib  | 5            | p.o.         | Single dose        |
|                    |             |    | JNJ-61186372 | 10           | i.p.         | Single dose        |
| Therapy resistance | Single drug | 10 | Osimertinib  | 5            | p.o.         | QD x 60 days       |
| Therapy resistance | Single drug | 10 | JNJ-61186372 | 10           | i.p.         | BIW x 12 weeks     |
| Therapy resistance | Combo       | 10 | Osimertinib  | 5            | p.o.         | QD x 80 days       |
|                    |             |    | JNJ-61186372 | 10           | i.p.         | BIW x 12 weeks     |

BIW; biweekly, QD; once daily

**B**

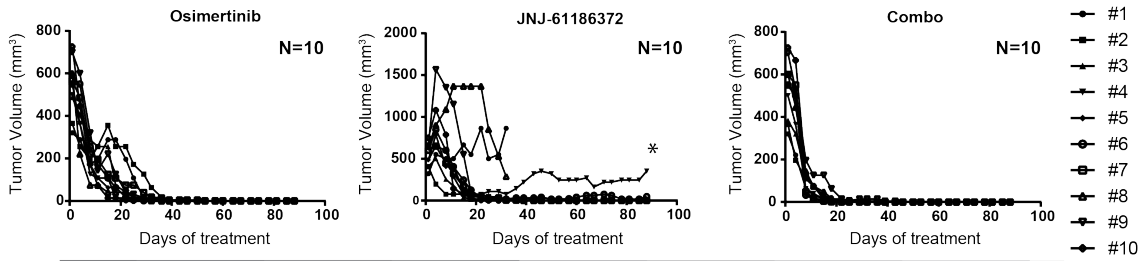

**C**

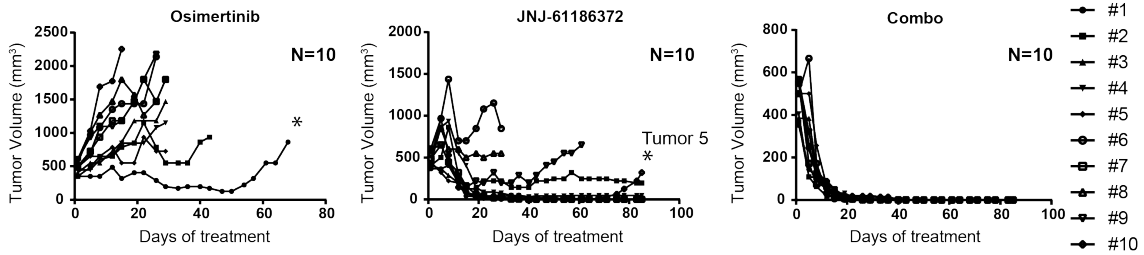

**D**

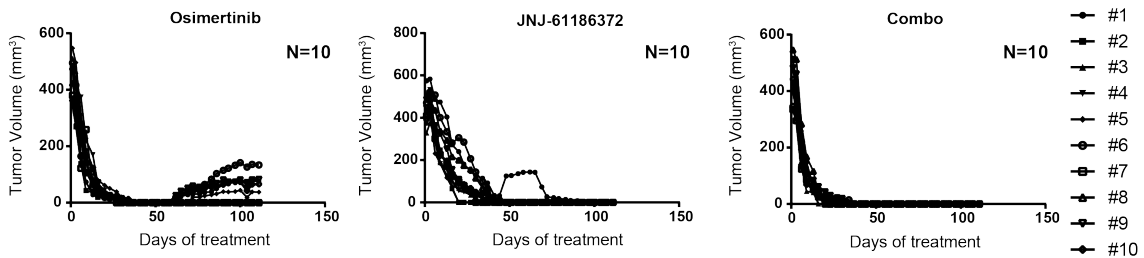

**E**

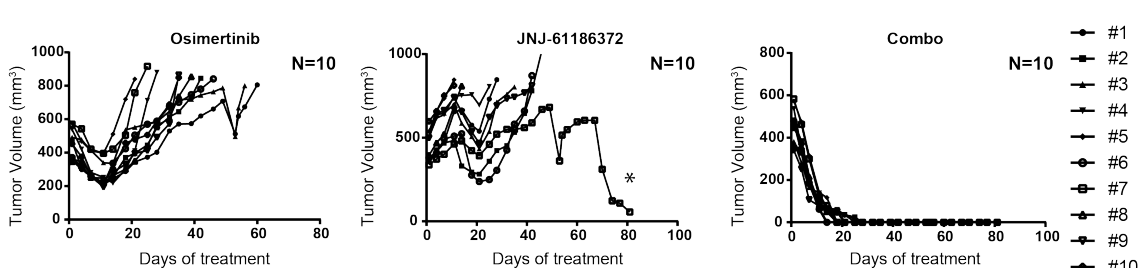

**Supplementary Figure S1. Resistant tumor growth is evident for osimertinib and JNJ-61186372 monotherapy in NSCLC cell line xenografts.** **A** Experimental design and dosing scheme for *in vivo* analysis of variation among vehicle-treated tumor, target efficacy evaluation and drug resistance. Cell lines (H1975, H1975-HGF, HCC827 and HCC827-ER1) were established as xenografts in nude mice. Mice were treated with osimertinib and JNJ-61186372 alone or in combination according to the scheme. N, number of mice per group, i.p., intraperitoneal injection, p.o., *per os* (oral). **B-E** Tumor growth curves displaying tumor volume (in mm<sup>3</sup>) measured every second day after treatment initiation. Results from four xenograft models (H1975, H1975-HGF, HCC827 and HCC827-ER1) upon mono- and combination therapy with osimertinib and JNJ-61186372 are displayed. 10 mice (N=10) were included per treatment group.

**A**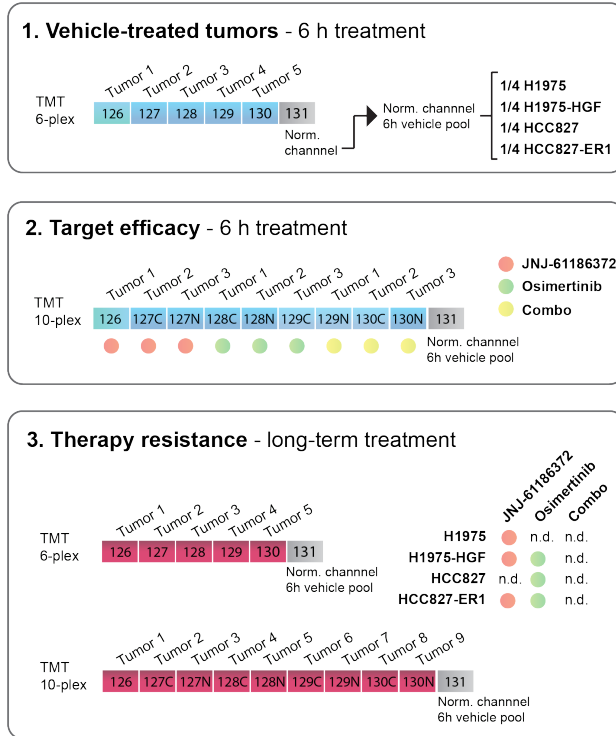**B**

| Experiment                  | Compound     | Duration  | Description       | MS identified phosphopeptides |
|-----------------------------|--------------|-----------|-------------------|-------------------------------|
| <b>H1975 cell line</b>      |              |           |                   |                               |
| Vehicle                     | PBS          | 6 hours   | Same group        | 234                           |
| Target efficacy             | Osimertinib  | 6 hours   | 3 from each group | 118                           |
|                             | JNJ-61186372 |           |                   |                               |
|                             | Combo        |           |                   |                               |
| Therapy resistance          | JNJ-61186372 | Long-term | Same group        | 407                           |
| <b>H1975-HGF cell line</b>  |              |           |                   |                               |
| Vehicle                     | PBS          | 6 hours   | Same group        | 517                           |
| Target efficacy             | Osimertinib  | 6 hours   | 3 from each group | 616                           |
|                             | JNJ-61186372 |           |                   |                               |
|                             | Combo        |           |                   |                               |
| Therapy resistance          | Osimertinib  | Long-term | Same group        | 335                           |
| Therapy resistance          | JNJ-61186372 | Long-term | Same group        | 328                           |
| <b>HCC827 cell line</b>     |              |           |                   |                               |
| Vehicle                     | PBS          | 6 hours   | Same group        | 315                           |
| Target efficacy             | Osimertinib  | 6 hours   | 3 from each group | 445                           |
|                             | JNJ-61186372 |           |                   |                               |
|                             | Combo        |           |                   |                               |
| Therapy resistance          | Osimertinib  | Long-term | Same group        | 253                           |
| <b>HCC827-ER1 cell line</b> |              |           |                   |                               |
| Vehicle                     | PBS          | 6 hours   | Same group        | 513                           |
| Target efficacy             | Osimertinib  | 6 hours   | 3 from each group | 559                           |
|                             | JNJ-61186372 |           |                   |                               |
|                             | Combo        |           |                   |                               |
| Therapy resistance          | Osimertinib  | Long-term | Same group        | 643                           |
| Therapy resistance          | JNJ-61186372 | Long-term | Same group        | 614                           |

**Supplementary Figure S2. Multiplex TMT-labeling scheme and results from MS analysis of NSCLC xenograft tumors.** **A** Overview of the setup for TMT labeled samples for quantitative mass spectrometry. Three types of analyses were performed to evaluate tumor variation in the vehicle-treated group, target efficacy and therapy resistance. 1. For each cell line, vehicle-treated tumors were measured as a TMT-6-plex including a normalization channel consisting of a pool of equal amounts of peptides from all 6 h vehicle-treated mice. 2. Target efficacy was measured as a TMT10plex for each cell line including peptides from 3 tumors of each treatment group (osimertinib, JNJ-61186372 and combo (osimertinib + JNJ-61186372)) together with a cell line specific pool of peptides from vehicle-treated tumors. 3. Therapy resistance was measured for each cell line as either a TMT-6-plex or TMT-10-plex depending on the number of resistant tumors. n.d., not detected. **B** Overview of phosphoproteomic data presenting the number of identified phosphorylated peptides resulting from analyses of vehicle-treated tumors, target efficacy and therapy resistance as indicated.

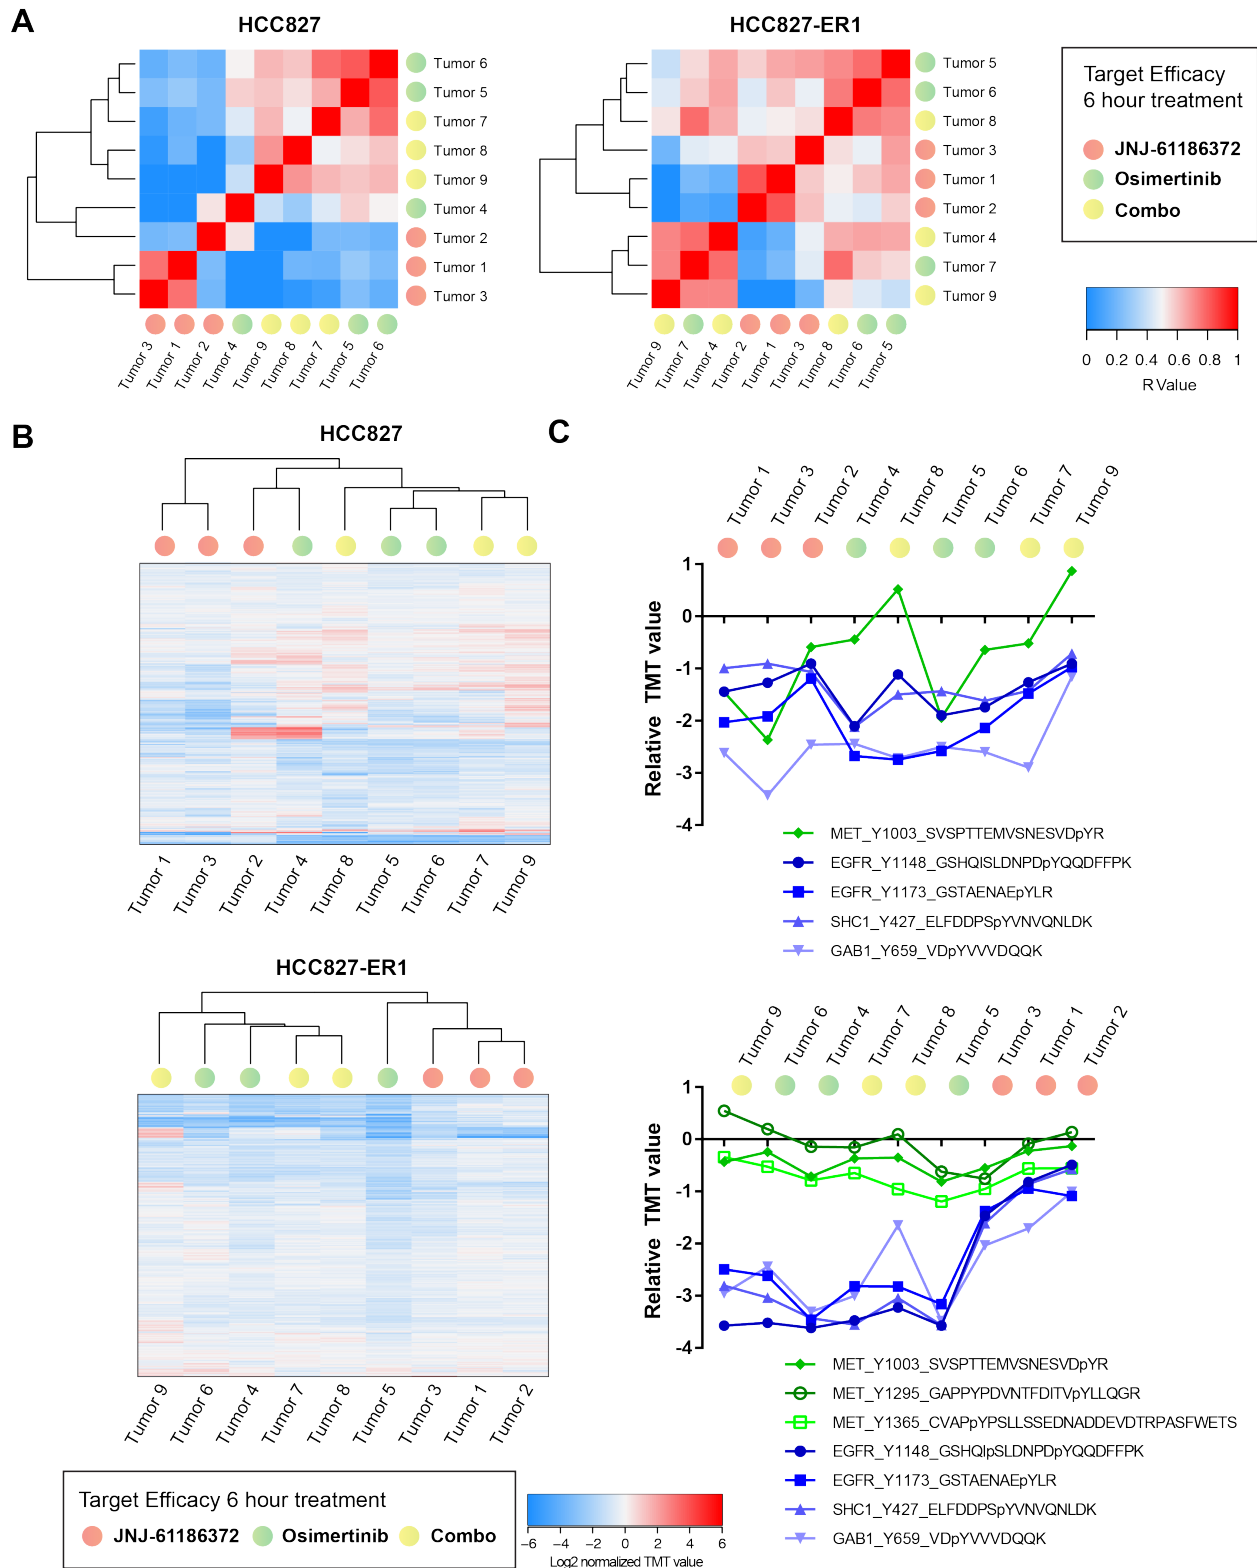

**Supplementary Figure S3. Evaluation of *in vivo* target efficacy in HCC827 and HCC827-ER1 xenografts after 6-hour treatment with osimertinib and JNJ-61186372 alone or in combination. A** Heatmaps of Pearson's correlation coefficient (R-value) from HCC827 (left) and HCC827-ER1 (right) xenograft models for evaluation of target efficacy upon 6 hours of treatment with osimertinib and JNJ-61186372 alone or in combination. **(B and C)** Hierarchical clustering (Euclidian distance) of relative

phosphopeptide changes (**B**) and extracted phosphotyrosine profiles from selected proteins (EGFR, Shc1 and Gab1) (**C**) as indicated to evaluate *in vivo* target efficacy. Results are presented for tumors from HCC827 (upper panels) and HCC827-ER1 (lower panels) xenografts. p, phosphorylated.

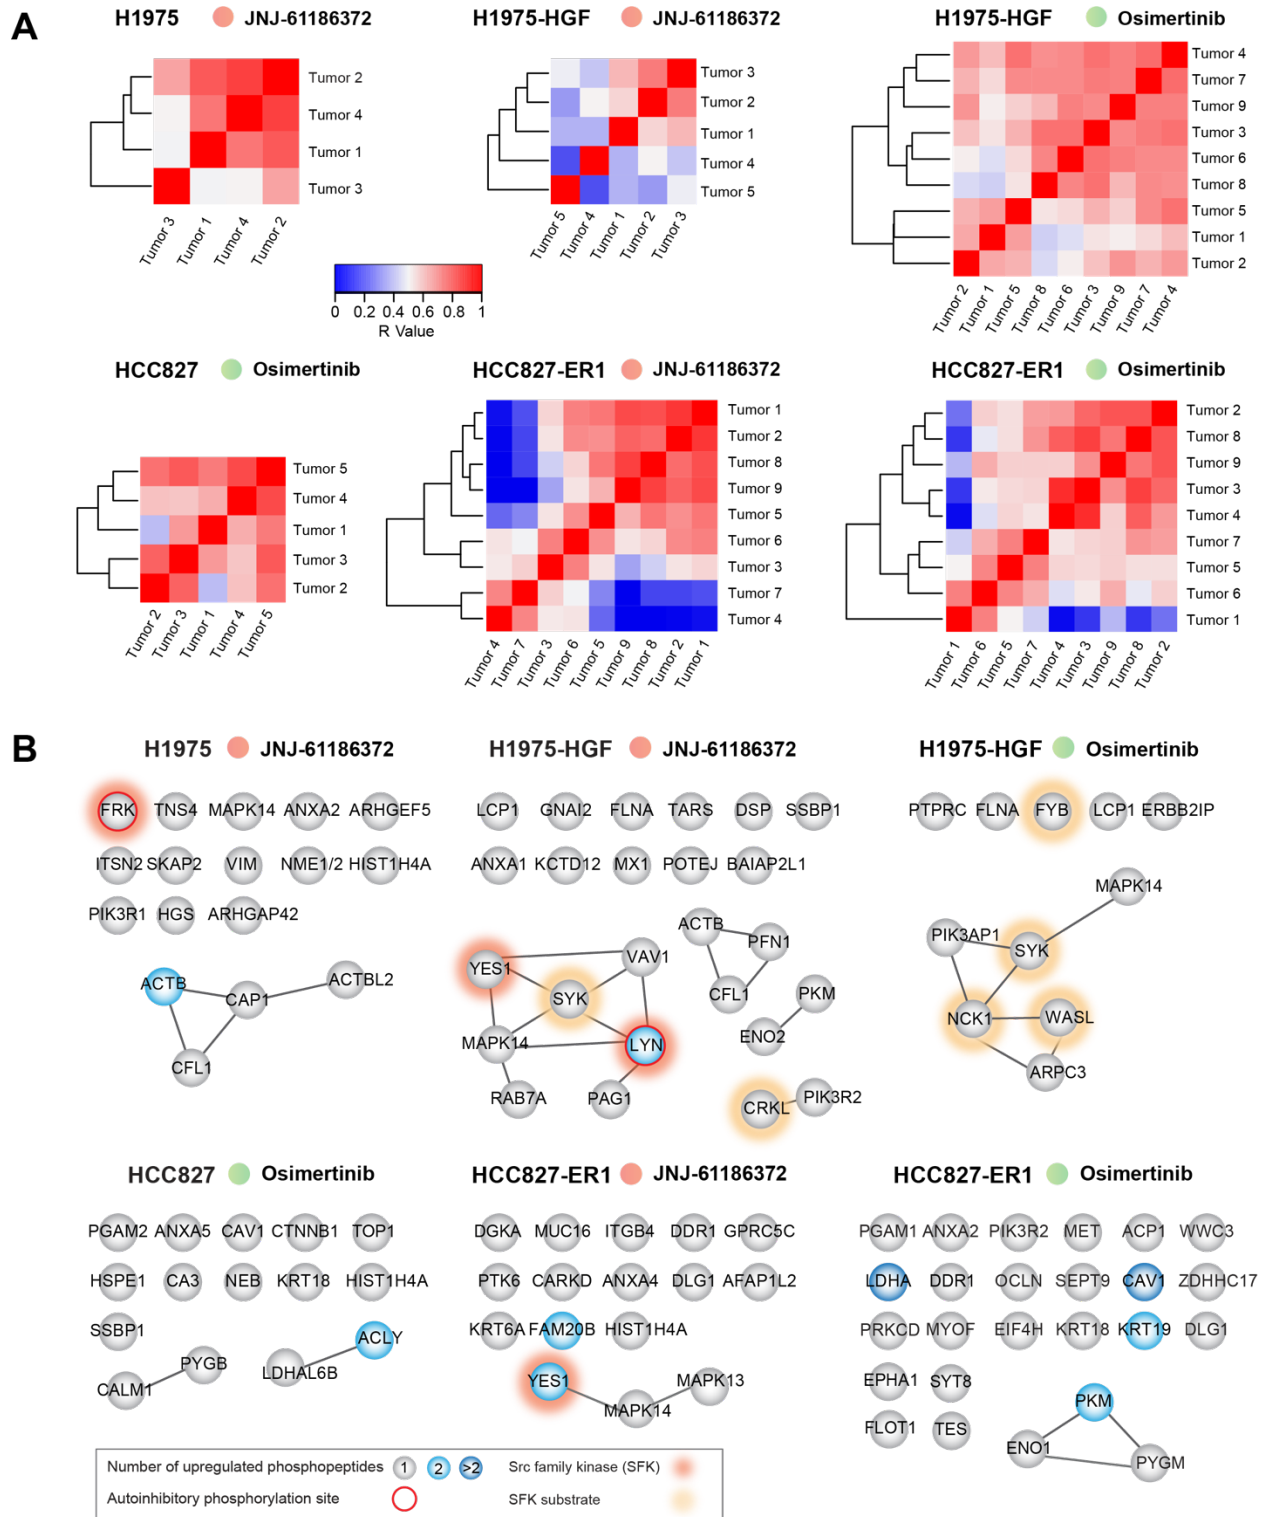

**Supplementary Figure S4. Phosphopeptide correlations in resistant tumors reveal heterogeneous tumor profiles.** **A** Heatmaps of Pearson's correlation coefficient (R-value) of phosphopeptide quantitation values from MS analyses of resistant xenograft models (H1975, H1975-HGF, HCC827 and HCC827-ER1) after long-term treatment with osimertinib and JNJ-61186372 monotherapy. **B** Phosphoprotein interaction networks for each group of resistant tumors as indicated. All proteins are represented by their gene name and have at least one phosphopeptide with a relative ratio >1.4 compared to the 6 h vehicle-treated tumors for minimum 5 of 9 tumors (TMT-10-plex) or 3 of 5 tumors (TMT-6-plex). Networks were generated using STRING.

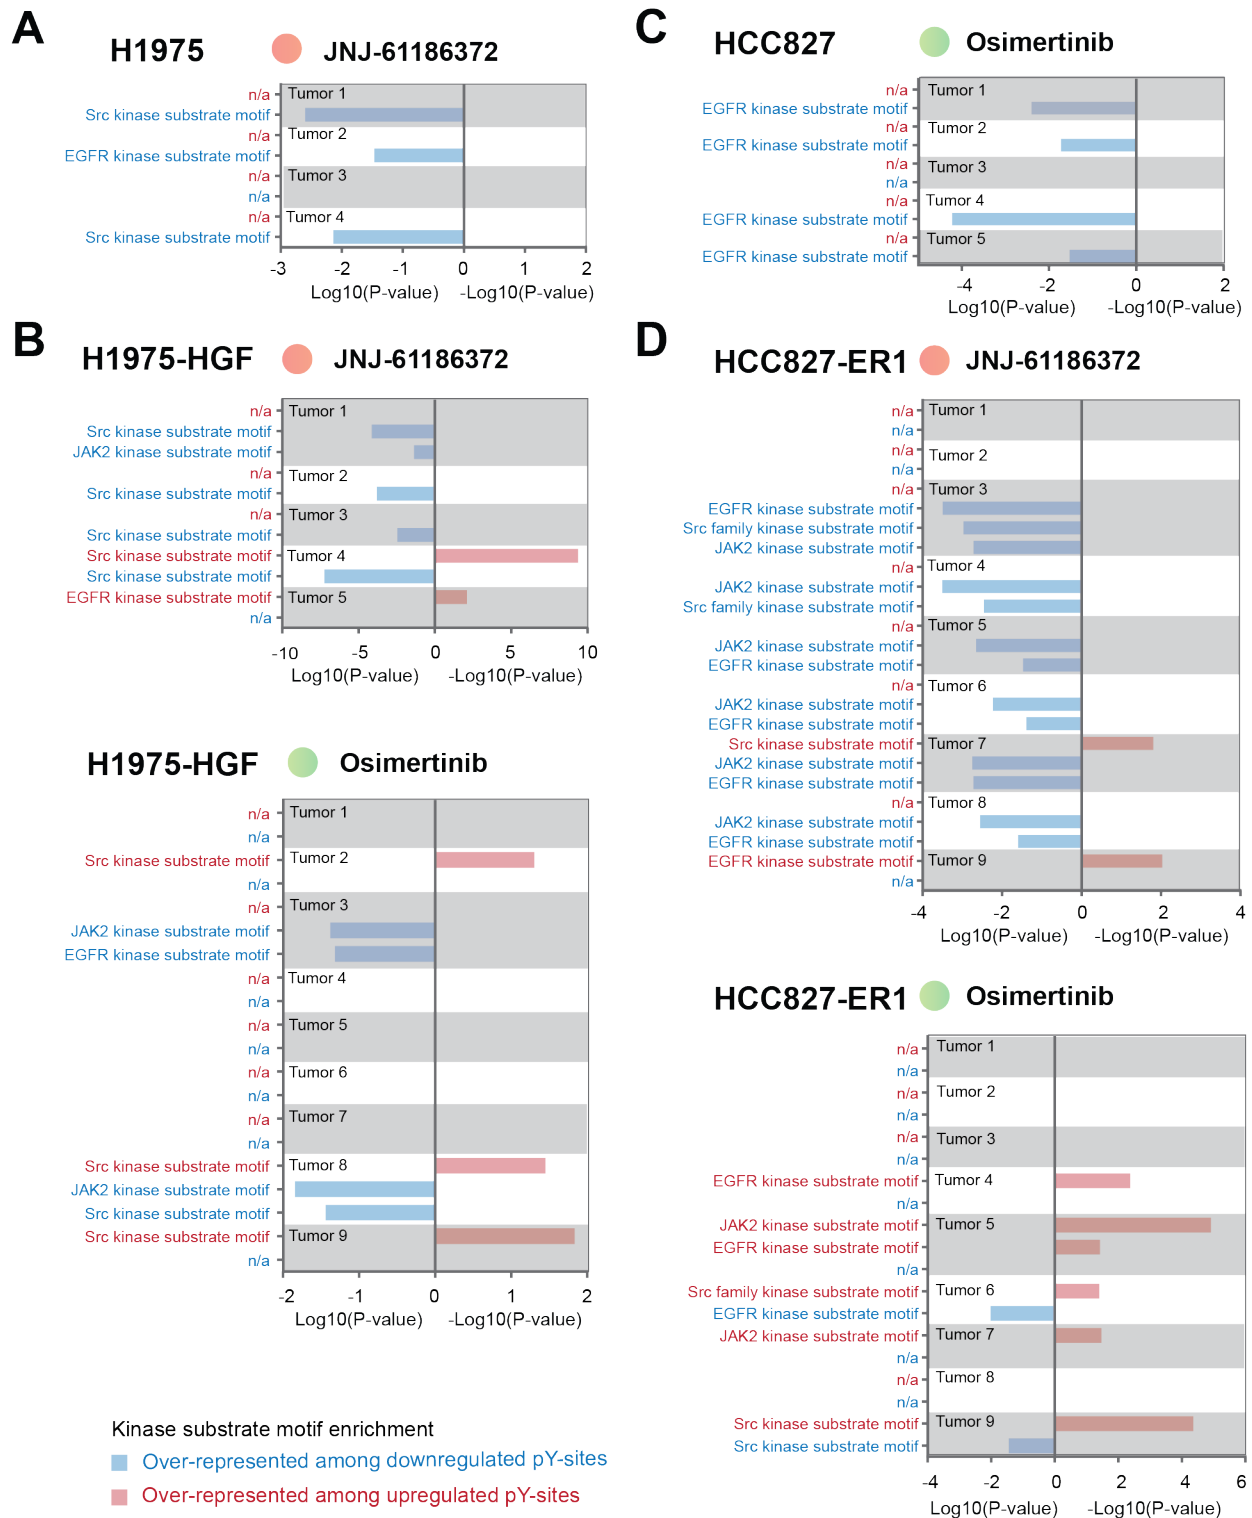

**Supplementary Figure S5. Kinase substrate motif enrichment analyses of resistant tumors.** Kinase substrate motif enrichment analysis was done independently for each treatment resistant tumor. Motifs within up- and downregulated pool of phosphotyrosines (pY) were compared to the non-regulated pool of phosphotyrosines (Fisher's exact test,  $P < 0.05$ ).



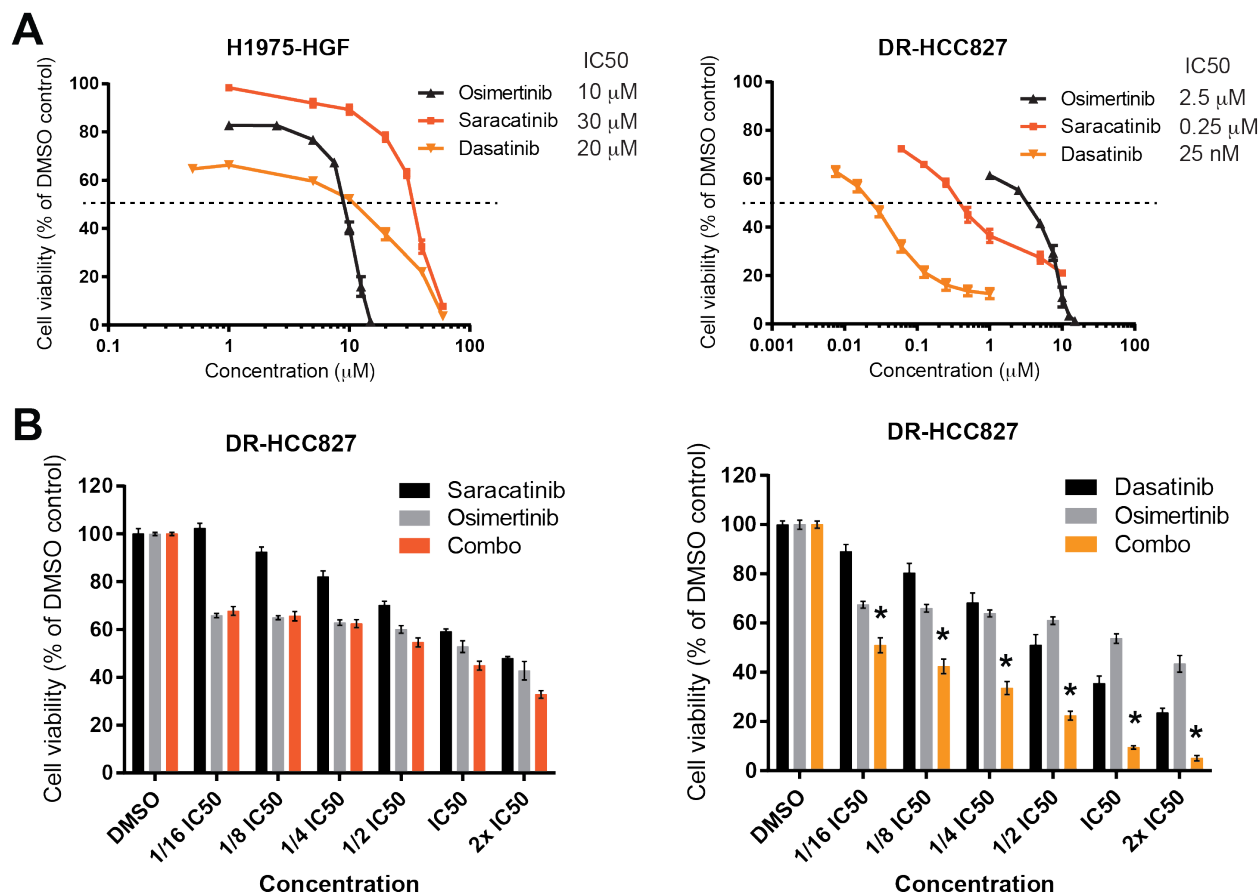

**Supplementary Figure S6. Heterogeneous phosphoprotein network upregulation in resistant tumors and combined EGFR and SFK inhibition results in superior growth inhibition of DR-HCC827 cells.**

**A** and **B** Cell viability of H1975-HGF (left) and DR-HCC827 (right) cells treated with the indicated concentrations of osimertinib, saracatinib and dasatinib. The approximate IC<sub>50</sub> values are indicated to the right of each graph. Data are means  $\pm$  SEM of three experiments. **C** Cell viability of DR-HCC827 cells treated with osimertinib and saracatinib (left) or dasatinib (right) alone or in combination. The compounds were used at the indicated concentrations. For the combination (combo) treatment a constant ratio was applied for the individual compounds (IC<sub>50</sub>; osimertinib: 2.5  $\mu$ M, saracatinib: 0.25  $\mu$ M, dasatinib: 25 nM). Data are means  $\pm$  SEM of three experiments. \* denotes a synergistic combination effect ( $\Delta I > 0$ ).

**Supplementary Table S1: Summary of data from vehicle-treated tumors.** List of identified and quantified phosphopeptides. Table is provided as an Excel file in the online additional supplementary materials.

**Supplementary Table S2: Summary of data from target efficacy evaluation.** List of identified and quantified phosphopeptides. Table is provided as an Excel file in the online additional supplementary materials.

**Supplementary Table S3: Summary of data from drug resistant tumors.** List of identified and quantified phosphopeptides. Table is provided as an Excel file in the online additional supplementary materials.
